# Supplementary material
Source: PubMed Central journal article supplement (PMC6058234)
Supplement: ba017699-suppl1.pdf [file ba017699-suppl1.pdf]

Supplemental Table 1. Incidence of Prespecified Complications by Treatment Group

| Complication                                                      | Platelets (N=137) |             | No Platelets (N=124) |            | P value |
|-------------------------------------------------------------------|-------------------|-------------|----------------------|------------|---------|
|                                                                   | N of events       | Percent     | N of events          | Percent    |         |
| Systemic inflammatory response syndrome                           | 89                | 65.0        | 61                   | 49.2       | 0.01    |
| Infection (UTI, wound, line, etc.)                                | 37                | 27.0        | 22                   | 17.7       | 0.07    |
| Sepsis                                                            | 27                | 19.7        | 15                   | 12.1       | 0.09    |
| Death                                                             | 13                | 9.5         | 25                   | 20.2       | 0.02    |
| Transfusion related metabolic complication                        | 21                | 15.3        | 17                   | 13.7       | 0.71    |
| Acute kidney injury                                               | 23                | 16.8        | 16                   | 12.9       | 0.38    |
| Acute lung injury                                                 | 13                | 9.5         | 9                    | 7.3        | 0.51    |
| Ventilator associated pneumonia                                   | 15                | 11.0        | 12                   | 9.7        | 0.74    |
| Acute respiratory distress syndrome                               | 13                | 9.5         | 7                    | 5.7        | 0.24    |
| Deep vein thrombosis                                              | 11                | 8.0         | 5                    | 4.0        | 0.17    |
| Abdominal complication                                            | 6                 | 4.4         | 4                    | 3.2        | 0.63    |
| Symptomatic pulmonary embolism                                    | 6                 | 4.4         | 5                    | 4.0        | 0.89    |
| Cardiac arrest                                                    | 4                 | 2.9         | 6                    | 4.8        | 0.43    |
| Asymptomatic pulmonary embolism                                   | 2                 | 1.5         | 5                    | 4.0        | 0.21    |
| Stroke                                                            | 2                 | 1.5         | 1                    | 0.8        | 0.62    |
| Multiple organ failure                                            | 1                 | 0.7         | 0                    | 0          | 0.32    |
| Additional bleeding after hemostasis<br>requiring IR/OR procedure | 0                 | 0           | 1                    | 0.8        | 0.32    |
| Transfusion related allergic reactions                            | 2                 | 1.5         | 0                    | 0          | 0.15    |
| Myocardial infarction                                             | 0                 | 0           | 1                    | 0.8        | 0.32    |
| Any prespecified complications                                    | 285               | 109 (79.6%) | 212                  | 99 (79.8%) | 1.00    |

Wald confidence interval and Wald test were calculated for the risk difference.
